# Supplementary material for: Three Perspectives: The Approach of Neoadjuvant Treatment of Rectum Cancer According to Medical Oncologists, Radiation Oncologists, and Surgeons
Source: Research Square preprint supplement (doi:10.21203/rs.3.rs-1236318/v2), 2022-03-29
Supplement: Supplementary file 1 [file ba782378e4fce5b7a5eea814.docx]

Questionnaire

1. Specialization
   1. Medical Oncologists
   2. Radiation Oncologists
   3. Surgeon
2. Age
   1. 30-40
   2. 41-50
   3. 51-60
   4. 61-70
3. Experience in Oncology
   1. 5 year or less
   2. 6-10
   3. 11-20
   4. 21-30
4. Title
   1. Fellow
   2. Assistant Professor/Specialist
   3. Associated Professor
   4. Professor
5. Affiliation
   1. State Hospital
   2. University Hospital
   3. Research and Education Hospital
   4. Private Hospital
6. What is the monthly number of newly diagnosed rectal cancer patients?
   1. 5 or less
   2. 6-10
   3. More than 10
7. What is the Radiotherapy Method You Use in the Neo-adjuvant Treatment of Rectal Cancers?
   1. Short-Course Radiotherapy (5x5 Gy)
   2. Long-Course Radiotherapy combined with Chemotherapy
8. Do you recommend chemotherapy after radiotherapy or chemoradiotherapy until the operation? (What's Your Center's Approach?)
   1. Yes
   2. No
9. How Many Applications If You Suggest? (Those who do not recommend can enter as 0) (What is your Center's Approach?)
   1. 0
   2. 1
   3. 2
   4. 3
   5. 4 or more
10. Which Regime Would You Prefer? (What's Your Center's Approach?)
    1. Do not Recommend
    2. Capecitabine/ 5-FU
